# Supplementary material for: Therapeutic effect of Bacillus Calmette–Guerin polysaccharide nucleic acid on mast cell at the transcriptional level
Source: PeerJ. 2019 Aug 21;7:e7404. doi: 10.7717/peerj.7404 (PMC6708377; doi:10.7717/peerj.7404)
Supplement: Table S1 [file peerj-07-7404-s002.xlsx]

## Sheet: Table S1
Table S1. The RT-PCR primers used for validation in our study
Gene	Primers	Length(bp)
GAPDH	F:5’-AAGTTCAACGGCACAGTCAAG-3’	119
	R:5’-TACTCAGCACCAGCATCACC-3’
ERBB4	F:5’-GCATGTGATGGAATCGGCAC-3’	131
	R: 5’-TCCCCATGAATGCCAGTGAC-3’
DDR1	F:5’-ATGGCCTGGGAGTGTATCCT-3’	131
	R: 5’-ACCTGCTCGTCTGTGAGTTG-3’
RSAD2	F:5’-GCATAGTGAGCAATGGCAGC-3’	194
	R: 5’-AGCCACCTTGTAATCCCTGC-3’
GFI1B	F:5’-CACCCACCTGCTCATCCATT-3’	141
	R: 5’-TTTCCACACACCTGGCACTT-3’
