# Supplementary material for: Therapeutic effect of Bacillus Calmette–Guerin polysaccharide nucleic acid on mast cell at the transcriptional level
Source: PeerJ. 2019 Aug 21;7:e7404. doi: 10.7717/peerj.7404 (PMC6708377; doi:10.7717/peerj.7404)
Supplement: Table S4 [file peerj-07-7404-s005.xlsx]

## Sheet: Table S4
Table S4. Differentially expressed mRNAs in sensitized RBL-2H3 cell treated with or without BCG-PSN
Symbol	NC(G1)	BCG-PSN treated (G2)	G2_vs_G1_log2FoldChange	Up/Down
Rcc1	3.56418	11.9117	8.34753	Up
Noa1	0	7.10573	7.10573	Up
LOC257642	9.82262	16.5459	6.72326	Up
LOC257642	9.63678	16.239	6.60225	Up
Ddr1	0.291662	6.77902	6.48736	Up
Smc3	6.00529	12.017	6.0117	Up
Gfi1b	0	5.67703	5.67703	Up
RT1-A1	0	5.67247	5.67247	Up
Hsd17b4	1.20563	6.68899	5.48336	Up
AABR07015080.1	6.72519	11.7537	5.02855	Up
LOC257642	1.76306	6.77956	5.0165	Up
AABR07000404.1	6.7445	11.7556	5.01108	Up
AABR07015079.1	6.39425	11.395	5.00077	Up
AABR07000402.1	6.39231	11.3783	4.98602	Up
AABR07063421.1	5.90101	10.8748	4.9738	Up
AABR07015055.2	6.024	10.9873	4.96331	Up
AABR07048791.1	5.94357	10.9065	4.96296	Up
NEWGENE_1305281	3.30548	8.25632	4.95085	Up
Gabbr1	3.95879	8.72353	4.76474	Up
AABR07015066.1	11.3134	16.0488	4.7354	Up
AABR07063424.1	11.2144	15.7231	4.50865	Up
ST7	3.54366	7.95044	4.40679	Up
AABR07015080.2	8.05526	12.4287	4.37346	Up
AABR07015055.1	4.65952	9.00867	4.34916	Up
AABR07015078.1	12.8177	17.1371	4.31936	Up
AABR07015078.2	8.13617	12.4108	4.27467	Up
Dusp14	0	4.02621	4.02621	Up
AABR07001807.1	0	3.81845	3.81845	Up
Rngtt	1.88535	5.47301	3.58765	Up
Npap60	0	3.54936	3.54936	Up
Ddx17	3.22911	6.73929	3.51019	Up
ST7	4.59724	7.97519	3.37796	Up
Nadk2	2.57679	5.89356	3.31676	Up
Zdhhc1	0	3.3148	3.3148	Up
AABR07034393.1	0.291662	3.54887	3.25721	Up
Nudt6	0.546238	3.6068	3.06057	Up
Ccdc153	0	3.02494	3.02494	Up
Comp	0	2.96041	2.96041	Up
Bud31	0.291662	3.21541	2.92375	Up
AC115509.1	0	2.81899	2.81899	Up
Fgg	0	2.79118	2.79118	Up
AY172581.9	6.73388	9.5078	2.77392	Up
Cit	6.89221	9.62722	2.73501	Up
Spata5	4.79445	7.47268	2.67823	Up
Ppp1r18	4.38923	7.01727	2.62803	Up
Rpa1	0	2.58244	2.58244	Up
AABR07015042.1	2.23157	4.80484	2.57326	Up
Cacnb3	0	2.51074	2.51074	Up
Rsad2	0	2.50501	2.50501	Up
Pigc	5.14077	7.6393	2.49853	Up
Lrif1	1.41722	3.84755	2.43033	Up
BC028528	0	2.40688	2.40688	Up
Tmem198	0	2.40285	2.40285	Up
Rmdn1	2.1068	4.50059	2.39379	Up
Abcg8	0	2.33525	2.33525	Up
Rell1	5.29557	7.60594	2.31037	Up
Pde6a	0	2.30481	2.30481	Up
Cpvl	0	2.29925	2.29925	Up
AABR07036312.3	1.22478	3.51141	2.28663	Up
Moap1	3.01242	5.28989	2.27748	Up
Rcn3	0.346833	2.61297	2.26614	Up
Clcf1	0	2.26273	2.26273	Up
AABR07025986.2	0	2.26273	2.26273	Up
Rabgap1l	2.29365	4.52575	2.23209	Up
Meioc	0	2.21856	2.21856	Up
Rn50_X_0636.4	0	2.17752	2.17752	Up
Dhrs7l1	3.4474	5.62057	2.17318	Up
Capn3	0	2.15587	2.15587	Up
Csf2	0	2.15545	2.15545	Up
Dock7	4.92909	7.08061	2.15152	Up
Pacsin2	4.68245	6.77737	2.09492	Up
Phox2a	1.34763	3.44178	2.09415	Up
Glrx3	3.01242	5.08492	2.0725	Up
AABR07064634.1	0.291662	2.33525	2.04358	Up
Lmna	1.74743	3.77359	2.02616	Up
Chst10	2.67788	4.69959	2.02171	Up
Slc26a8	5.20056	7.21807	2.01751	Up
Plin4	1.674	3.63804	1.96404	Up
Dock6	0.933117	2.89425	1.96114	Up
Ovol1	1.5894	3.53203	1.94263	Up
AABR07015081.1	12.4783	14.3898	1.91154	Up
AABR07015067.1	12.4723	14.3794	1.90706	Up
AABR07015056.1	12.4719	14.3788	1.90687	Up
AABR07063462.1	12.4703	14.3676	1.89734	Up
Cisd3	4.99533	6.87495	1.87962	Up
5S_rRNA	1.02537	2.86944	1.84406	Up
Adgre4	4.40468	6.20834	1.80366	Up
Oxsm	5.09965	6.90192	1.80227	Up
Mrps14	5.58216	7.27291	1.69074	Up
Adgrv1	2.93604	4.62265	1.68661	Up
Arhgef1	6.63879	8.28474	1.64595	Up
AY172581.24	9.37648	11.0138	1.63733	Up
AABR07048790.1	6.76873	8.37055	1.60183	Up
Ifi44	3.71806	5.31876	1.60069	Up
Tnfrsf9	6.05627	7.63235	1.57608	Up
Slx1b	3.55185	5.12702	1.57516	Up
AABR07015089.1	5.73398	7.26673	1.53275	Up
Tango6	2.27223	3.79345	1.52122	Up
Clasrp	5.97191	7.44211	1.4702	Up
Prrc2b	3.55441	5.00481	1.45041	Up
Abcb1a	3.35463	4.8028	1.44817	Up
Ivns1abp	2.98723	4.38189	1.39466	Up
Kmt2d	8.85849	10.2515	1.39304	Up
Jakmip1	2.72311	4.11386	1.39075	Up
AABR07063425.1	14.3269	15.708	1.38112	Up
Nsmaf	2.72744	4.09862	1.37118	Up
Rn5-8s	7.16307	8.52089	1.35782	Up
Cep89	3.40554	4.73952	1.33398	Up
Zc3h12c	7.09032	8.42117	1.33085	Up
Stxbp4	6.39559	7.72309	1.32751	Up
AABR07000400.1	6.87365	8.18563	1.31198	Up
Gnpnat1	8.81647	10.122	1.30555	Up
Zfp799	4.53448	5.8394	1.30492	Up
AABR07048787.1	7.72514	9.02477	1.29963	Up
Plaur	4.59444	5.89216	1.29771	Up
Odf2l	2.77044	4.05576	1.28532	Up
Pdzd11	6.00178	7.26688	1.2651	Up
Dcun1d2	6.05179	7.30558	1.25379	Up
AABR07063425.2	14.3442	15.5905	1.2463	Up
Lrp6	7.83703	9.05175	1.21473	Up
Pdzk1ip1	3.39794	4.59225	1.1943	Up
Zfp346	7.48796	8.68006	1.1921	Up
2018-09-08	3.53112	4.71369	1.18257	Up
Fhad1	3.09963	4.27567	1.17604	Up
Tm6sf1	6.74314	7.88774	1.1446	Up
Snx12	6.31412	7.45424	1.14012	Up
Mtmr7	3.61597	4.74205	1.12608	Up
Abcb7	7.88993	9.0098	1.11987	Up
Hspa2	5.50001	6.58441	1.0844	Up
Thrb	5.39969	6.4832	1.08352	Up
Ddx17	10.387	11.4625	1.07543	Up
Id1	3.17908	4.23804	1.05895	Up
Fry	9.63129	10.6693	1.03797	Up
Hsd17b8	4.5539	5.58854	1.03464	Up
Ophn1	3.6939	4.70516	1.01127	Up
Endov	4.80575	5.81557	1.00981	Up
Dcun1d2	7.60942	6.60286	-1.00656	Down
St6gal1	10.446	9.38134	-1.06462	Down
Samd15	4.80101	3.72235	-1.07865	Down
Dnttip1	5.58062	4.49936	-1.08125	Down
Mmd	6.46324	5.38172	-1.08151	Down
Mplkip	6.02016	4.92854	-1.09162	Down
Sec24c	8.88328	7.77676	-1.10652	Down
Nup37	7.87074	6.75549	-1.11525	Down
Tmem237	5.87598	4.76045	-1.11553	Down
Yipf6	7.54992	6.42911	-1.12081	Down
Sap25	6.72981	5.60859	-1.12122	Down
Dhx30	10.1869	9.03149	-1.15541	Down
Pdha1	6.64093	5.47913	-1.1618	Down
Samd4a	4.82633	3.64642	-1.1799	Down
Mad2l2	8.43997	7.25425	-1.18572	Down
Thra	5.5848	4.36581	-1.21899	Down
Ncaph2	9.83797	8.56294	-1.27504	Down
Cbfa2t3	4.11867	2.82981	-1.28887	Down
Smc3	12.6784	11.3822	-1.29612	Down
Dgke	5.68695	4.36581	-1.32114	Down
Agtpbp1	8.57557	7.24526	-1.33031	Down
Tgfbrap1	5.93705	4.56839	-1.36866	Down
Apoe	4.23279	2.82144	-1.41135	Down
Fam110a	6.87368	5.41683	-1.45685	Down
Mocs2	8.20272	6.74444	-1.45827	Down
Nhs	5.77473	4.30081	-1.47392	Down
Wdyhv1	5.88023	4.39943	-1.4808	Down
Ap2b1	9.12536	7.64215	-1.48321	Down
Gxylt1	3.47302	1.93571	-1.53731	Down
Frmpd1	4.38619	2.82238	-1.56381	Down
Elk4	11.9007	10.3082	-1.59249	Down
Nampt	6.24065	4.64766	-1.59299	Down
Gmppa	7.6803	6.05527	-1.62503	Down
Vegfa	4.42364	2.75699	-1.66664	Down
Arhgef10l	3.31144	1.64101	-1.67043	Down
Rpl9	4.95824	3.26785	-1.69039	Down
Tmbim6	5.26736	3.38896	-1.8784	Down
Vprbp	9.99318	8.10376	-1.88942	Down
Hps4	7.44789	5.44477	-2.00312	Down
LOC687399	4.23841	2.2211	-2.01731	Down
Pls1	2.34367	0.322692	-2.02098	Down
Nat3	2.0344	0	-2.0344	Down
Cyp2d5	2.08119	0	-2.08119	Down
AABR07051564.1	2.10654	0	-2.10654	Down
Tnfrsf14	3.52242	1.39298	-2.12944	Down
Ston1	3.39094	1.25896	-2.13198	Down
Erbb4	2.14302	0	-2.14302	Down
RT1-A1	7.18609	5.03104	-2.15505	Down
AABR07050006.1	2.18292	0	-2.18292	Down
Hspb11	3.51252	1.29397	-2.21855	Down
Ece2	2.77015	0.537137	-2.23301	Down
Ccdc78	2.25512	0	-2.25512	Down
Zdhhc1	3.22021	0.964438	-2.25578	Down
Lss	6.84707	4.56283	-2.28424	Down
Pla2g12b	2.29365	0	-2.29365	Down
Cyp4f18	2.88083	0.514079	-2.36675	Down
Abhd6	7.4517	5.06028	-2.39142	Down
Rbpms2	2.4487	0	-2.4487	Down
Olr516	2.48235	0	-2.48235	Down
Slc47a2	2.52364	0	-2.52364	Down
Rffl	7.32802	4.71386	-2.61416	Down
Saxo2	3.6202	0.999266	-2.62093	Down
Kcnj9	3.12616	0.502127	-2.62404	Down
Zfp13	2.98486	0.322692	-2.66217	Down
Duox2	3.30965	0.637096	-2.67255	Down
Gfi1b	6.21517	3.47612	-2.73906	Down
Impad1	5.69793	2.9346	-2.76332	Down
Gabbr1	8.31004	5.34063	-2.96941	Down
Ntn1	3.38686	0.322692	-3.06417	Down
Hsd11b2	3.70411	0.637096	-3.06701	Down
Mmp12	3.12117	0	-3.12117	Down
Nxf2	4.12137	0.828683	-3.29268	Down
Pspc1	5.81203	2.48289	-3.32914	Down
Rn60_Y_0001.1	4.4682	1.03756	-3.43065	Down
Gpx4	4.79613	1.3044	-3.49173	Down
Crtap	5.06173	1.55334	-3.50839	Down
Trip13	6.24615	2.09894	-4.14721	Down
Micu2	5.87773	0.976475	-4.90125	Down
Adgre4	5.4039	0.502127	-4.90177	Down
Rab1a	5.88527	0.976475	-4.90879	Down
Trafd1	6.61413	1.50139	-5.11274	Down
Rcc1	12.4482	5.4676	-6.9806	Down
Srgap2	9.41518	2.26209	-7.15309	Down
Vps53	9.44335	0	-9.44335	Down
