# Supplementary material for: Therapeutic effect of Bacillus Calmette–Guerin polysaccharide nucleic acid on mast cell at the transcriptional level
Source: PeerJ. 2019 Aug 21;7:e7404. doi: 10.7717/peerj.7404 (PMC6708377; doi:10.7717/peerj.7404)
Supplement: Table S5 [file peerj-07-7404-s006.xlsx]

## Sheet: Table S5
Table S4. Up and down-regulated differential genes by log2 fold change in RBL-2H3 cells pretreated with or without BCG-PSN
Genes	Log2 fold change	Up/down
DDR1	6.9615	Up
Trafd1	5.1136	Down
MMP12	3.4967	Down
GFI1B	2.9358	Down
ERBB4	2.3104	Down
RSAD2	2.7427	Up
